# Supplementary material for: More than just a ticket canceller: the mitochondrial processing peptidase tailors complex precursor proteins at internal cleavage sites
Source: PubMed Central journal article supplement — Mol Biol Cell. 2020 Nov 15;31(24):2657–68. doi: 10.1091/mbc.E20-08-0524 (PMC8734313; doi:10.1091/mbc.e20-08-0524), 2020-11-15

# Supplemental Materials

*Molecular Biology of the Cell*

Friedl *et al.*

## Supplementary Figures

### **Supplementary Figure 1. Arg5,6 is internally processed by MPP *in vitro* and separate expression of Arg5 and Arg6 *in vivo* is non-toxic and can restore arginine prototrophy.**

(A) Radiolabeled Arg5,6 precursor was incubated with purified MPP for indicated times. EDTA was added as a control to inhibit the enzymatic activity of MPP. Reactions were analyzed by SDS-PAGE, Western blotting and autoradiography. (B) Radiolabeled Arg5,6 precursor was incubated with mitochondria isolated from wild type or *mas1<sup>ts</sup>* cells. Mitochondria were incubated at 37°C for 20 min before the precursor was added to inactivate MPP. (C-D) The indicated Arg5,6 variants are expressed in yeast cells lacking *ARG5,6* and cells are streaked out on plates with minimal medium containing arginine. (E) Cells are grown in liquid minimal medium without arginine for 72 hours at 30°C. The optical density at 600 nm was measured every 10 min. (F) Radiolabeled Arg5<sup>344-863</sup> and Su9-Arg5<sup>344-863</sup> were incubated with purified MPP for 90 min. Its processing was analyzed by SDS-PAGE, Western blotting and autoradiography.

### **Supplementary Figure 2. Tandem organization of Arg5,6 is conserved in fungi, whereas algae synthesize two separate proteins.**

A database of 150 eukaryotes was searched for homologs of full length Arg5,6 and the separate Arg5 and Arg6 proteins of *S. cerevisiae*. Red, species in which the Arg5,6 homolog is encoded as fusion protein. Blue, Arg6 and Arg5 homologs are encoded as separate proteins. Black, no homolog of Arg5,6 found or unclear pattern.

## Supplementary Tables

**Supplementary Table 1.** Evolutionary conservation of the *ARG5,6* gene structure

**Supplementary Table 2.** Yeast strains and plasmids used in this study.

**Supplementary Table 3.** Numerical source data for Figures 2, 5 and 6.

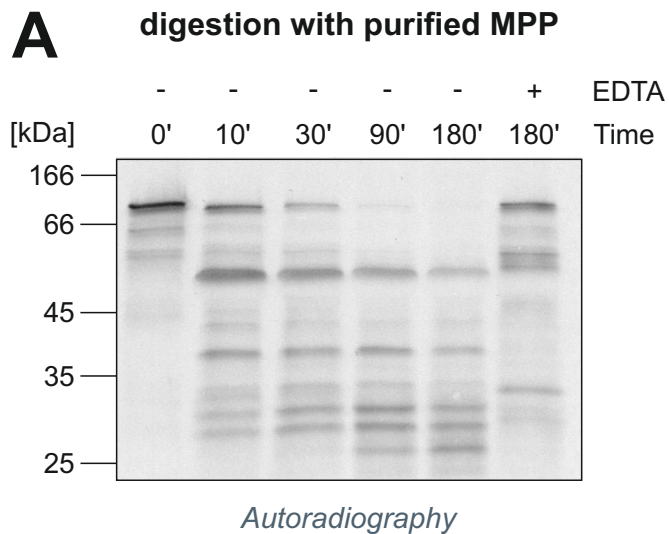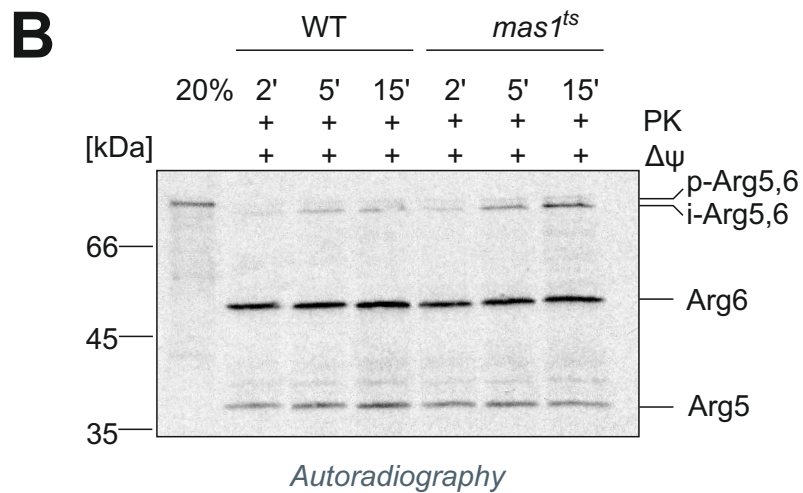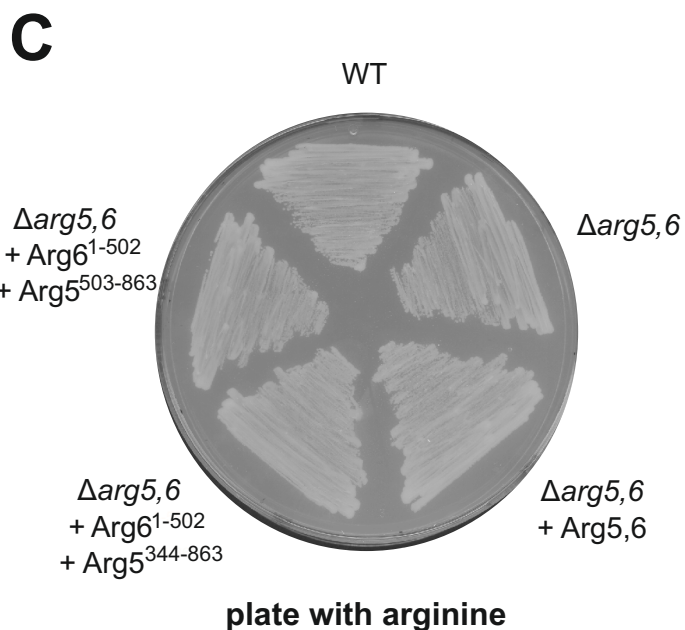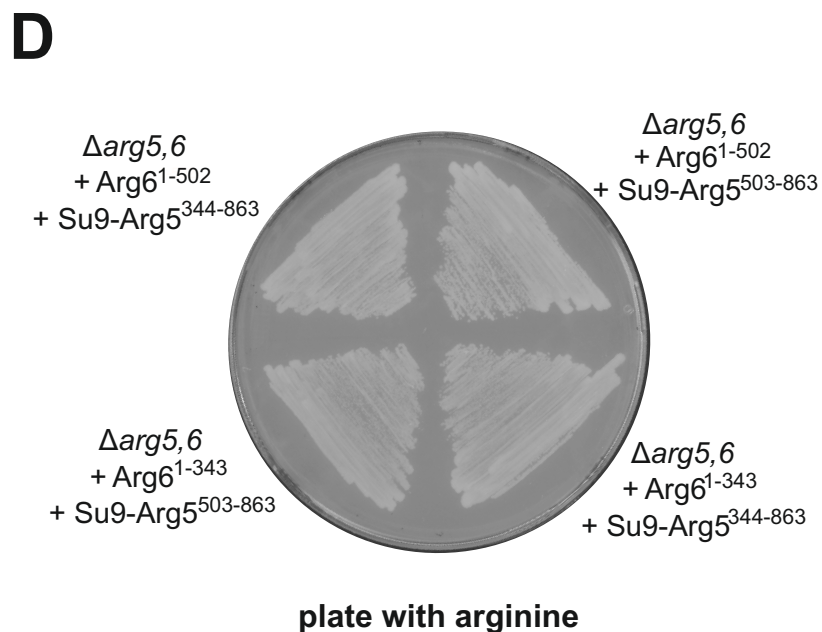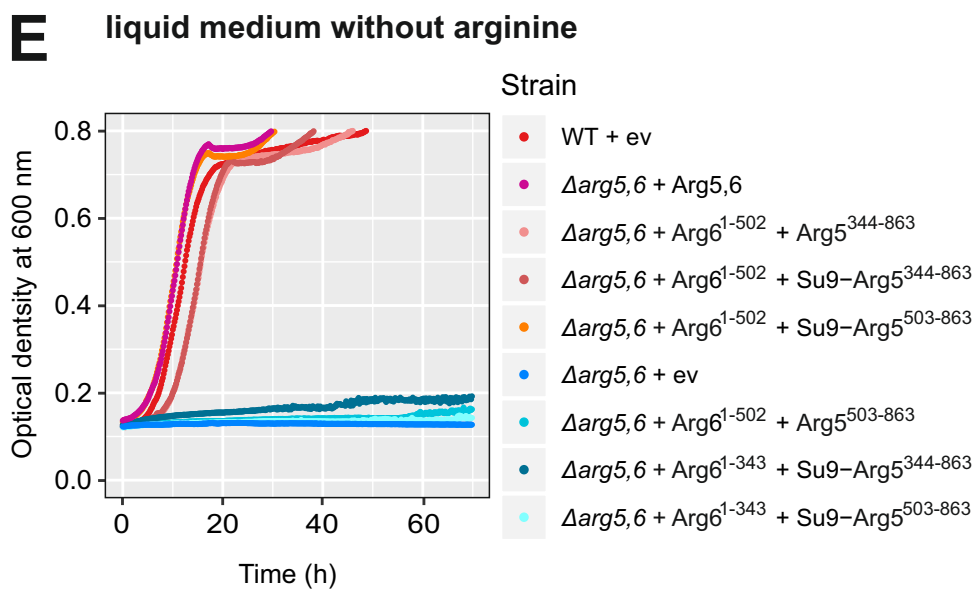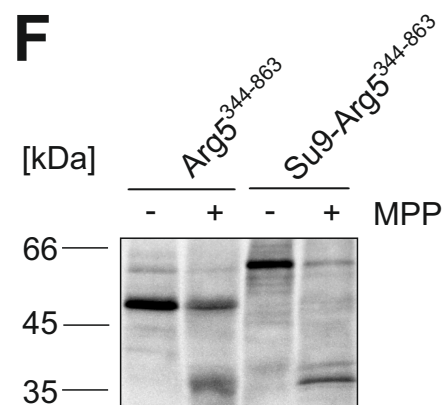

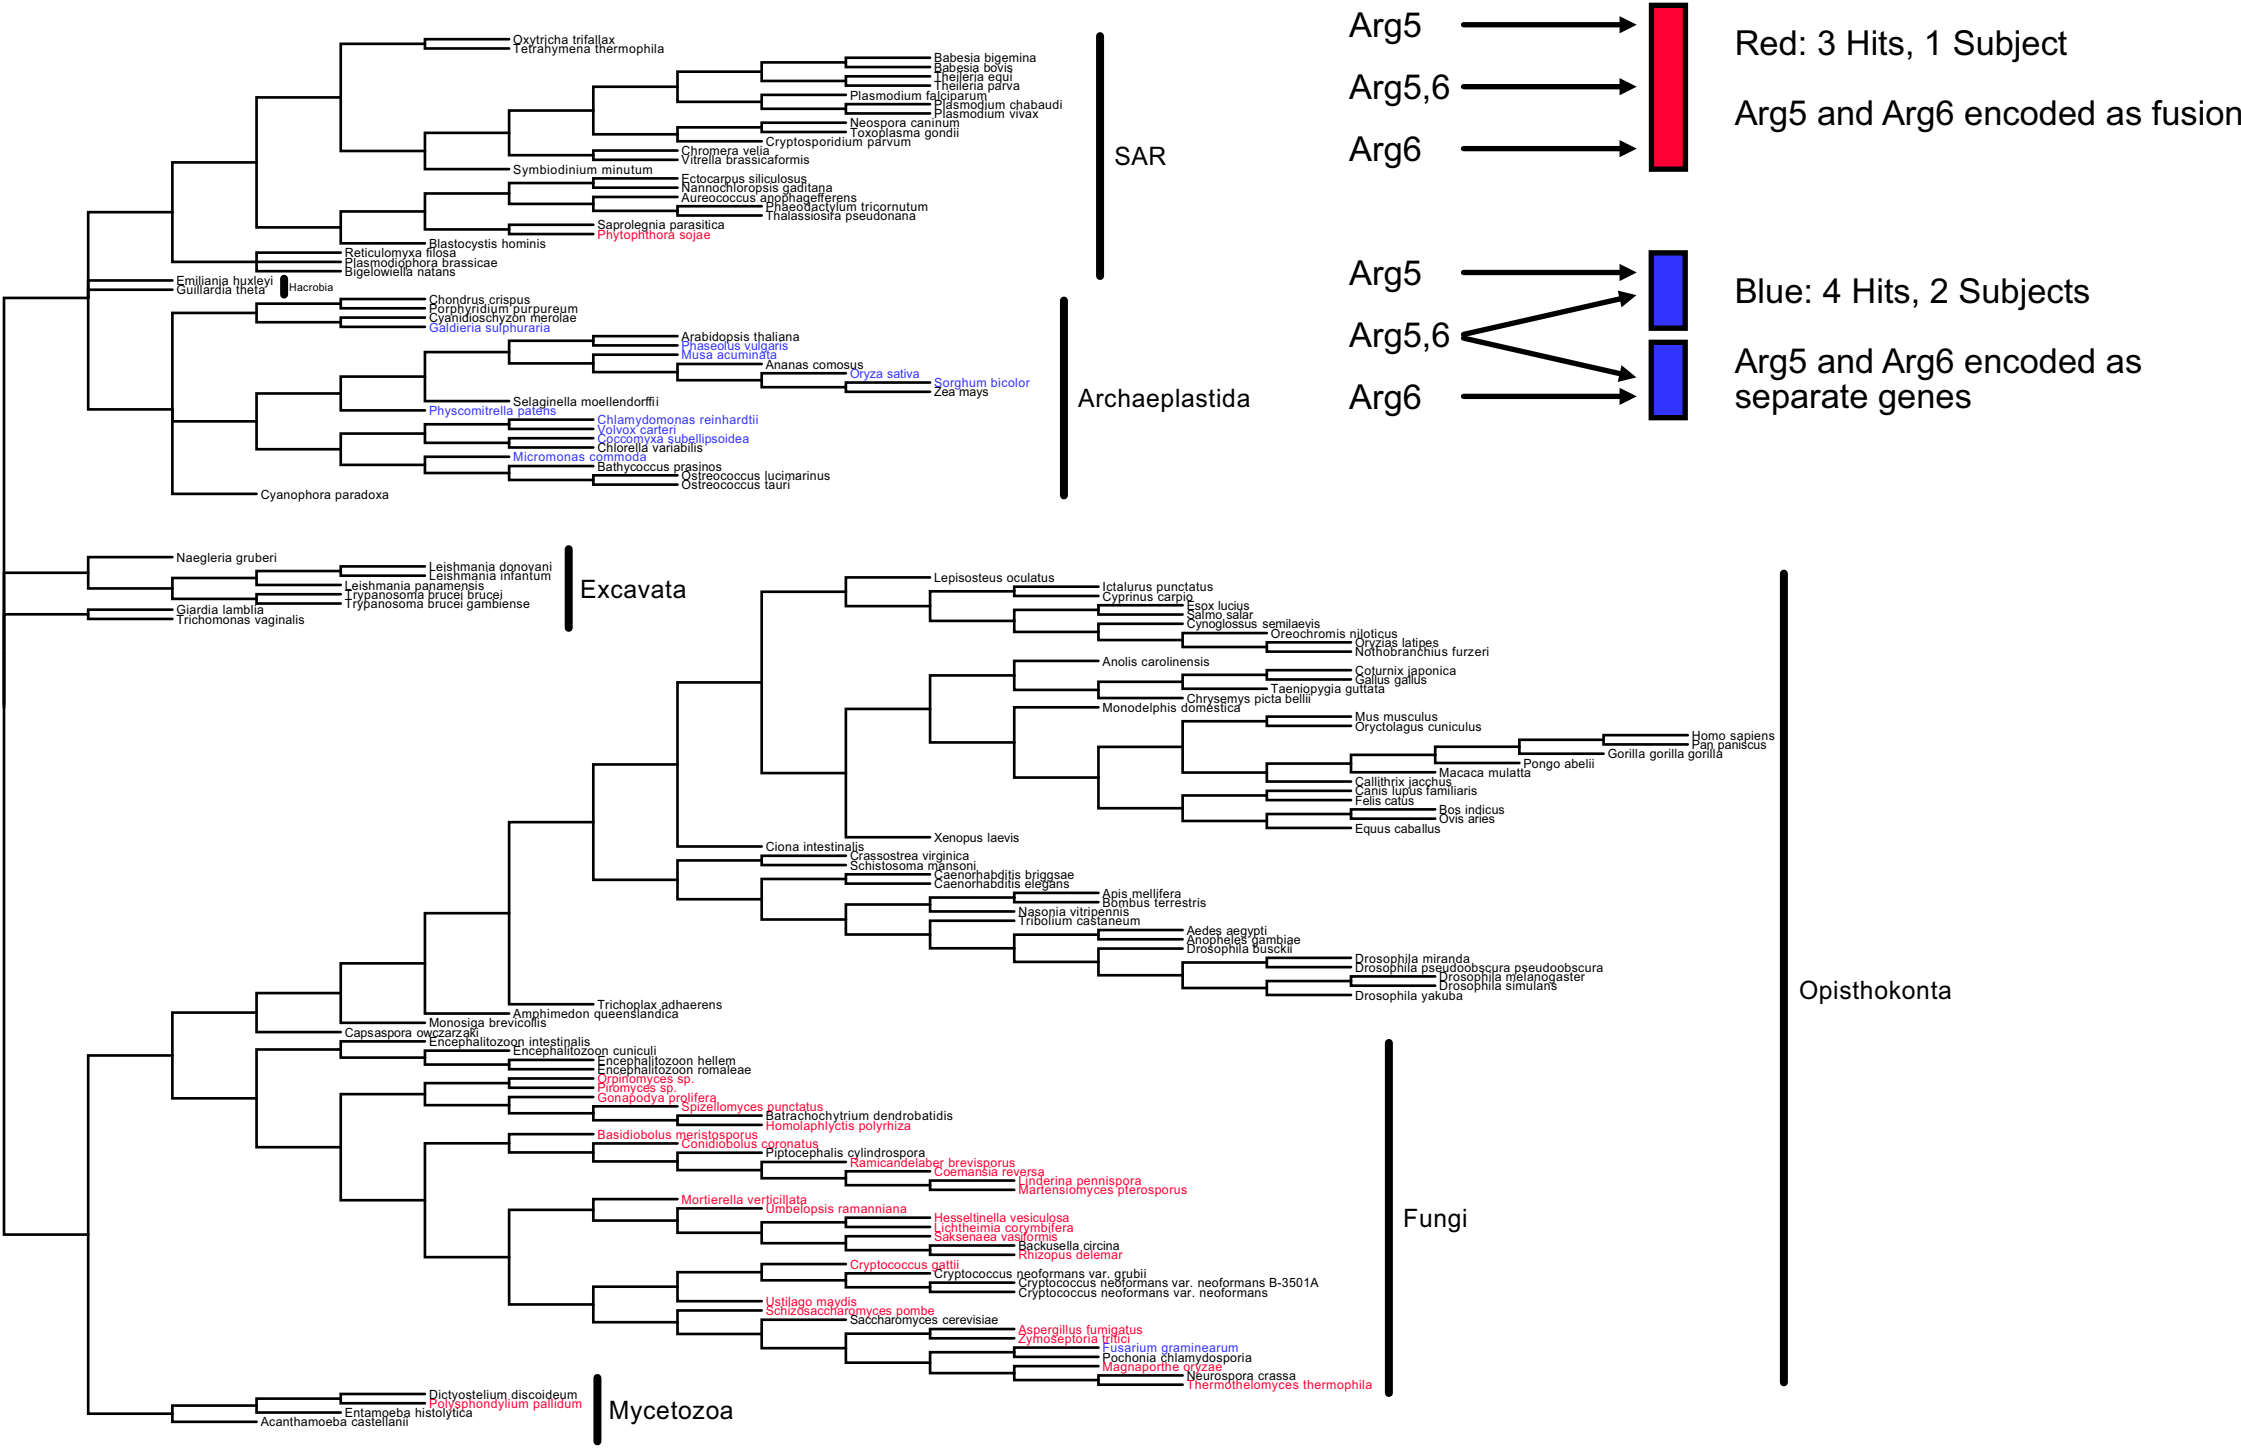

Supplement: mbc-31-2657-s001.pdf [file mbc-31-2657-s001.pdf]
