# Supplementary material for: More than just a ticket canceller: the mitochondrial processing peptidase tailors complex precursor proteins at internal cleavage sites
Source: PubMed Central journal article supplement — Mol Biol Cell. 2020 Nov 15;31(24):2657–68. doi: 10.1091/mbc.E20-08-0524 (PMC8734313; doi:10.1091/mbc.e20-08-0524), 2020-11-15
Supplement: mbc-31-2657-s005.pdf [file mbc-31-2657-s005.pdf]

# More than just a ticket canceller: The mitochondrial processing peptidase tailors complex precursor proteins at internal cleavage sites

Jana Friedl, Michael Knopp, Carina Groh, Eyal Paz, Sven Gould, Johannes Herrmann, and Felix Boos

*Corresponding author(s): Felix Boos, University of Kaiserslautern*

---

## **Review Timeline:**

|                     |            |
|---------------------|------------|
| Submission Date:    | 2020-08-11 |
| Editorial Decision: | 2020-08-13 |
| Revision Received:  | 2020-09-21 |
| Accepted:           | 2020-09-25 |

---

*Editor-in-Chief: Matthew Welch*

## **Transaction Report:**

(Note: With the exception of the correction of typographical or spelling errors that could be a source of ambiguity, letters and reports are not edited. The original formatting of letters and referee reports may not be reflected in this compilation.)

RE: Manuscript #E20-08-0524

TITLE: "More than just a ticket canceller: The mitochondrial processing peptidase tailors complex precursor proteins at internal cleavage sites"

Dear Dr. Boos:

I have read your manuscript entitled "More than just a ticket canceller: The mitochondrial processing peptidase tailors complex precursor proteins at internal cleavage sites" and the review documents resulting from its previous submission to eLife that you provided.

This paper could be acceptable for publication in MBoC if the reviewer comments can be addressed. In particular, the key issue is to more firmly establish that MPP is indeed the protease responsible for the internal cleavage of the Arg6-Arg5 precursor. Thus, I think you need to pay particular attention to reviewer 1's point #2 (which is echoed by reviewer 2). I'm also wondering whether temperature shift experiments using mas1 and/or mas2 temperature sensitive cells could be informative here.

With your revised manuscript, please send us a point by point summary of your responses to the referees' comments, and the revisions you make to the paper.

Thank you for submitting this very interesting work to Molecular Biology of the Cell.

best wishes,

Thomas D. Fox

Sincerely,  
Thomas Fox  
Monitoring Editor  
Molecular Biology of the Cell

-----  
Dear Dr. Boos,

The review of your manuscript, referenced above, is now complete. The Monitoring Editor has decided that your manuscript requires minor revisions before it can be published in Molecular Biology of the Cell, as described in the Monitoring Editor's decision letter above and the reviewer comments (if any) below.

A reminder: Please do not contact the Monitoring Editor directly regarding your manuscript. If you have any questions regarding the review process or the decision, please contact the MBoC Editorial Office ([mboc@ascb.org](mailto:mboc@ascb.org)).

When submitting your revision include a rebuttal letter that details, point-by-point, how the Monitoring Editor's and reviewers' comments have been addressed. (The file type for this letter

must be "rebuttal letter"; do not include your response to the Monitoring Editor and reviewers in a "cover letter.") Please bear in mind that your rebuttal letter will be published with your paper if it is accepted, unless you have opted out of publishing the review history.

Authors are allowed 180 days to submit a revision. If this time period is inadequate, please contact us immediately at [mboc@ascb.org](mailto:mboc@ascb.org).

In preparing your revised manuscript, please follow the instruction in the Information for Authors ([www.molbiolcell.org/info-for-authors](http://www.molbiolcell.org/info-for-authors)). In particular, to prepare for the possible acceptance of your revised manuscript, submit final, publication-quality figures with your revision as described.

To submit the rebuttal letter, revised version, and figures, please use this link (please enable cookies, or cut and paste URL): Link Not Available

Authors of Articles and Brief Communications whose manuscripts have returned for minor revision ("revise only") are encouraged to create a short video abstract to accompany their article when it is published. These video abstracts, known as Science Sketches, are up to 2 minutes long and will be published on YouTube and then embedded in the article abstract. Science Sketch Editors on the MBoC Editorial Board will provide guidance as you prepare your video. Information about how to prepare and submit a video abstract is available at [www.molbiolcell.org/science-sketches](http://www.molbiolcell.org/science-sketches). Please contact [mboc@ascb.org](mailto:mboc@ascb.org) if you are interested in creating a Science Sketch.

Thank you for submitting your manuscript to Molecular Biology of the Cell. Please do not hesitate to contact this office if you have any questions.

Sincerely,

Eric Baker  
Journal Production Manager  
MBoC Editorial Office  
[mbc@ascb.org](mailto:mbc@ascb.org)

-----



***Molecular Biology of the Cell***  
The American Society for Cell Biology  
6120 Executive Boulevard, Suite 750  
Rockville, MD 20852, USA

**CELL BIOLOGY**  
**Dr. Felix Boos**

Gebäude 13  
Erwin-Schrödinger-Straße  
67663 Kaiserslautern  
Germany  
Phone: +49 631 2052409  
Fax: +49 631 2052492  
Email: [fboos@rhrk.uni-kl.de](mailto:fboos@rhrk.uni-kl.de)  
[www.bio.uni-kl.de/zellbiologie/home/](http://www.bio.uni-kl.de/zellbiologie/home/)

■

**Revision of our manuscript #E20-08-0524 for *MBoC***

Kaiserslautern  
September 21, 2020

Dear Tom Fox,

■ Thank you very much for evaluating our manuscript. We were pleased to see that you found our paper interesting and in principle suitable for publication in *MBoC*. We addressed the points that were raised by the reviewers, especially (but not only) those emphasized in your decision letter. You find our point-by-point answers to the reviewers' comments below.

■ We feel that these additional experiments considerably strengthened our manuscript and firmly established MPP as processing protease for internal cleavage of the Arg5,6 precursor. We included several new experiments in the revised manuscript (novel Figures 1E, 2B, 2C, 6B, S1B and S1F) as well as some clarifications and additional comments suggested by the reviewers. Even though we did our best to keep the text as concise as possible, we now exceeded the limits of a Brief Report to an extent that makes it difficult to shorten without sacrificing content. In addition, we deem it beneficial to present the findings on MPP being the protease responsible for cleavage (Fig. 1) and the determination of the precise cleavage site (Fig. 2) in two separate figures, thereby increasing the number of display items to six. In our opinion, the new data and the textual additions made during the revision are important and would be misplaced in the supplementary material. Therefore, we would like to request the conversion of our manuscript to the Article format. Please let us know in case that you feel that this is not appropriate. In that instance, we would be grateful for your advice on how to shorten the manuscript to adhere to the Brief Report restrictions.

We hope that our revisions satisfactorily addressed the concerns of the reviewers. We are convinced that our work on internal precursor processing as a novel *bona fide* function of MPP is of broad interest for the cell biology community. Please feel free to contact us with any questions that may have remained open.

All best,

A handwritten signature in blue ink, appearing to read "Felix F. ...". The signature is fluid and cursive, with a long horizontal stroke at the end.

*This paper could be acceptable for publication in MBoC if the reviewer comments can be addressed. In particular, the key issue is to more firmly establish that MPP is indeed the protease responsible for the internal cleavage of the Arg6-Arg5 precursor. Thus, I think you need to pay particular attention to reviewer 1's point #2 (which is echoed by reviewer 2). I'm also wondering whether temperature shift experiments using mas1 and/or mas2 temperature sensitive cells could be informative here.*

We thank the editor for the positive evaluation of our manuscript. We addressed the points raised by the reviewers, especially those emphasized by the editor, as detailed below. We particularly thank the editor for his valuable suggestion to use a *mas1* temperature sensitive mutant, which we now used for *in vitro* and *in vivo* experiments that are presented in the revised version of the manuscript.

*Reviewer #1 (General assessment and major comments (Required)):*

*1. The authors use purified MPP to show that in vitro synthesized Arg5,6 precursor can be processed to the correct sized products. At that point, the authors "conclude that Arg5,6 is imported into the mitochondrial matrix and processed twice by MPP". This is plausible, but is premature based on the data, which show that MPP is able to process Arg5,6. However, the conclusion that MPP actually does process Arg5,6 in vivo is not documented, and the alternative that something else does this job is not formally excluded. This caveat should be acknowledged unless the authors are able to show necessity of MPP, not just sufficiency.*

As detailed in our response to point 2, we now added several new experiments to address the necessity of MPP for internal cleavage, both *in vitro* and *in vivo*. We therefore now have much stronger evidence that MPP is *the* protease responsible for internal processing of the Arg5,6 precursor in the mitochondrial matrix.

*2. The experiment showing cleavage with purified MPP (Fig. 1E and S1A) would be strengthened with control experiments using a catalytically inactive mutant of MPP, and a Arg5,6 substrate with a mutated site for cleavage. The first control would rigorously exclude any contaminants, and the second would help verify the site of cleavage.*

We addressed this point by various approaches. We used a temperature-sensitive *mas1<sup>ts</sup>* mutant and tested its ability to cleave Arg5,6 both *in vivo* and *in organello*. Both approaches concordantly showed that this mutant has defects in processing of Arg5,6 both at its MTS (as expected for an MPP mutant) and at its internal cleavage site (novel Figure 1E and Suppl. Figure 1B). In addition, we predicted MPP cleavage sites in the iMTS-L region of Arg5,6 with *in silico* sequence analysis (novel Figure 2B) and generated Arg5,6 mutants in which we changed these putative MPP recognition motifs. These variants could be imported into isolated mitochondria *in vitro*. When the RSY motif at amino acid position 523-525 was mutated, no internal processing was observed, while mutation of the RGY motif at amino acid position 549-551 did not affect internal cleavage of the precursor (novel Figure 2C). Hence, the internal cleavage site of Arg5,6 adheres to the classical R-2 motif at position 524, and the cleavage by MPP is presumably followed by an Icp55-mediated processing of the newly formed N-terminus of Arg5.

3. *The conclusion that MPP processes Arg5,6 at the correct site in their in vitro experiments is based on size by SDS-PAGE. The resolution is not sufficient to draw this conclusion, which should be adjusted to say that processing occurs at approximately the correct site (unless the authors perform additional analysis to document the precise cleavage site). Mutagenesis of the putative site (point 2 above) would also be helpful in establishing the site more precisely.*

As described above, our mutagenesis experiments identified the site of cleavage to occur at position 524, which is in perfect agreement with the fragment sizes observed by SDS-PAGE.

4. *The smaller products seen in Fig. 1E would seem to suggest that MPP exhibits a degree of promiscuity in vitro that is not seen in vivo. This should be noted in the text.*

We discussed this possibility in the revised version in the context of cleavage site recognition *in vitro* versus *in vivo* (line 236). See also our response to point 6 for further details.

5. *The authors observe that Arg6(1-343) cannot replace Arg6(1-502). They conclude that residues 344-502 are needed for enzyme activity, but this could be for many reasons. For example, Arg6(1-343) might not associate with Arg5. It is premature to imply that catalytic activity is impaired without making such measurements. The conclusion should be adjusted.*

We adjusted the paragraph on the enzymatic activity as suggested by the reviewer (line 202).

6. *It is worth testing whether Arg5(344-862) produced by in vitro translation can be processed by purified MPP. This would help distinguish between some intrinsic problem with access versus a more nuanced issue relating to how import is mediated by the iMTS-L versus a bona fide MTS (e.g., with only the latter recruiting MPP as speculated by the authors).*

We thank the reviewer for her/his suggestion – this is a very interesting point. We tested whether purified MPP can process Arg5(344-863) in an *in vitro* reaction. Indeed, Arg5(344-863) can be cleaved internally by MPP in this organelle-free assay (novel Suppl. Figure 1F). An N-terminal presequence was not required for the *in vitro* cleavage (even though it appears as if the efficiency of processing was slightly higher when a Su9 presequence was fused to the construct), in contrast to the results we obtained *in organello* and *in vivo*. This clearly shows that the lack of internal cleavage of the Arg5(344-863) precursor is not an artificial problem of this truncated construct, since the cleavage site is accessible in this minimal system. Instead, internal processing of proteins by MPP obviously is a regulated process inside mitochondria. As pointed out by the reviewer, this finding is best compatible with our model of MPP recruitment by a *bona fide* N-terminal MTS and subsequent “scanning” for internal cleavage sites once loaded onto the precursor. It will be exciting to study the mode of regulation in detail in the future.



*Reviewer #2 (General assessment and major comments (Required)):*

*Arg5, 6, a polyprotein is cleaved to produce two proteins Arg5 and Arg6. The authors report that production of these two proteins is mediated by a mitochondrial protease that is known for its function in N-terminal cleavage. The in vitro analysis is interesting, but the possibility of a contaminating activity cannot be ruled out. This needs to be tested by additional experiments, preferably by more data in intact cells.*

We addressed this point by various approaches as specified above in the response to point 2 of reviewer #1. Thereby, we now provide ample data from *in vitro*, *in organello* and *in vivo* experiments that firmly establish MPP as the protease responsible for internal processing of Arg5,6.

RE: Manuscript #E20-08-0524R

TITLE: "More than just a ticket canceller: The mitochondrial processing peptidase tailors complex precursor proteins at internal cleavage sites"

Dear Dr. Boos:

I am pleased to accept your manuscript for publication in Molecular Biology of the Cell. As you suggested, the paper will be published as a regular Article.

Sincerely,  
Thomas Fox  
Monitoring Editor  
Molecular Biology of the Cell

-----  
Dear Dr. Boos:

Congratulations on the acceptance of your manuscript.

A PDF of your manuscript will be published on MBoC in Press, an early release version of the journal, within 10 days. The date your manuscript appears at [www.molbiolcell.org/toc/mboc/0/0](http://www.molbiolcell.org/toc/mboc/0/0) is the official publication date. Your manuscript will also be scheduled for publication in the next available issue of MBoC.

Within approximately four weeks you will receive a PDF page proof of your article.

Your paper is among those chosen by the Editorial Board for Highlights from MBoC. Highlights from MBoC appears in the ASCB Newsletter and highlights the important articles from the most recent issue of MBoC.

All Highlights papers are also considered for the MBoC Paper of the Year. In order to be eligible for this award, however, the first author of the paper must be a student or postdoc. Please email me to indicate if this paper is eligible for Paper of the Year.

Would you like to see an image related to your accepted manuscript on the cover of MBoC? Please contact the MBoC Editorial Office at [mboc@ascb.org](mailto:mboc@ascb.org) to learn how to submit an image.

Authors of Articles and Brief Communications are encouraged to create a short video abstract to accompany their article when it is published. These video abstracts, known as Science Sketches, are up to 2 minutes long and will be published on YouTube and then embedded in the article abstract. Science Sketch Editors on the MBoC Editorial Board will provide guidance as you prepare your video. Information about how to prepare and submit a video abstract is available at [www.molbiolcell.org/science-sketches](http://www.molbiolcell.org/science-sketches). Please contact [mboc@ascb.org](mailto:mboc@ascb.org) if you are interested in creating a Science Sketch.

We are pleased that you chose to publish your work in MBoC.

Sincerely,

Eric Baker  
Journal Production Manager  
MBoC Editorial Office  
[mbc@ascb.org](mailto:mbc@ascb.org)

---
